# Supplementary material for: Excess Winter Deaths in Europe: a multi-country descriptive analysis
Source: Oxford University Press journal article supplement (doi:10.1093/eurpub/cku073), 2014-06-11
Supplement: cku073_Supplementary_Data.zip [file cku073_Supplementary_Data.zip]

Archive with 4 entries (4 files):
- ejph-2013-09-om-0692-File006.pdf
- ejph-2013-09-om-0692-File008.pdf
- ejph-2013-09-om-0692-File005.pdf
- ejph-2013-09-om-0692-File007.pdf
